# Supplementary material
Source: PubMed Central journal article supplement (PMC3910792)
Supplement: AAC.01281-13_zac001142459so1.pdf [file AAC.01281-13_zac001142459so1.pdf]

## 1 SUPPLEMENTARY DOCUMENT

### 2 SUPPLEMENTARY MATERIALS AND METHODS

3 **Time-of-addition assay.** A time-of-compound-addition assay was performed to approximate the step  
4 of the virus life cycle that was inhibited by compound. BHK21 cells were plated at a density of  $5 \times$   
5  $10^4$  cells per well in 24-well plates containing 0.5 ml of culture medium, followed by incubation for  
6 16h at 37°C, and synchronously infected with DENV at an MOI of 0.1. At different indicated time  
7 points before or after infection, 12  $\mu$ M of BP13944 or 0.12 % DMSO was treated to the cells. The  
8 culture medium were collected at 72 h post infection and subjected to plaque assay as described  
9 above. The mean values and S.E.M. from three independent experiments are plotted.

10 **Protein sequence alignment.** Sequences of NS3 protease domain (residues 1-184) of DENV-1  
11 (strain Hawaii), DENV-2 (strain PL046), DENV-3 (strain H-87), DENV-4 (strain H-241), and JEV  
12 (strain RP9) were collected from GenBank (<http://www.ncbi.nlm.nih.gov/nucleotide/>). The sequences  
13 alignment was computed using ClustalW.

14 **NS3 protein and unwinding reaction.** The DENV-2 NS3 protein (strain PL046) was expressed as  
15 His tagged-SUMO-NS3 fusion protein in *E. coli* BL21 (DE3) cells. The His-SUMO-NS3 protein was  
16 purified by Ni-NTA column chromatography as previously described (83). The purified protein was  
17 treated with SUMO protease, and then the His tagged-SUMO domain and the full-length NS3 protein  
18 were resolved by a second Ni-NTA column chromatography, and the full-length NS3 protein was  
19 collected from the unbound fractions.

20 RNA oligos T16 and B41 and DNA oligo B16 were purchased from commercial source. The  
21 B41 RNA oligo was 5'-end labeled by [ $\gamma$ - $^{32}$ P] ATP and T4 polynucleotide kinase. T16/B41 RNA  
22 duplex was made by heat-denaturation and renaturation of complementary molecules at a 1:1. The  
23 RNA duplex was gel purified for the unwinding assay.

24 The standard unwinding assay contained 2 nM pre-formed, gel purified T16/B41 RNA duplex,

25 100 nM full-length NS3 protein, 20 mM HEPES (pH7.5), 2 mM DTT, 10 mM NaCl, 1 mM  
26  $MgCl_2/ATP$ , 500 nM of trap DNA B16, and 10% DMSO or BP13944 of the indicated concentration.

27 The RNA duplex, NS3 protein, and 10% DMSO or BP13944 were pre-incubated in the reaction  
28 buffer for 30 min at 37°C. The unwinding reaction was initiated by the addition of  $MgCl_2/ATP$  and  
29 B16 trap DNA. After a 30 min reaction at 37°C, the unwinding reaction was terminated by the  
30 treatment of protease K (in 1% SDS and 0.1 M EDTA) for 30 min. Different nucleic acid species  
31 were resolved on a 20% polyacrylamide-3 M urea-0.5x TBE gel at 4°C. The gel was dried, and the  
32 radiolabeled RNA species were quantified using Phosphoimager and Image Quant software.

33 **SUPPLEMENTARY TABLE 1.** Oligonucleotide primers, hydrolysis probe, RNA and DNA oligos employed for cDNA synthesis,  
 34 PCR amplification, and unwinding reaction

| Oligonucleotides        | Sequence                                                                                                                                                                      |
|-------------------------|-------------------------------------------------------------------------------------------------------------------------------------------------------------------------------|
| <i>SacI</i> -Sp6-5UTR-F | 5'-AGTGAATTGTAATACGACTCACTATAGGGCGAATTGGAGCTCATTTAGGTGACACTATAGAGTTG-3'                                                                                                       |
| C102-R                  | 5'-GGGGTCGTACACCTTGGAAGCCAT TGCAGTTCTGCGCCTCCTGTTCAA-3'                                                                                                                       |
| Neo-R                   | 5'-GAAGAACTCGTCAAGAAGGCGATA-3'                                                                                                                                                |
| DV2.PS-R                | 5'-AGAACCTGTTGATTCACAAGC-3'                                                                                                                                                   |
| DV2.L1-R                | 5'-CATTCCATTTTCTGGCGTTCT-3'                                                                                                                                                   |
| DV2.U2-F                | 5'-AAGGTGAGATGAAGCTGTAGTCTC-3'                                                                                                                                                |
| DV2.P1                  | 5'-CTGTCTCCTCAGCATCATTCCAGGCA-3'                                                                                                                                              |
| IRES-F                  | 5'-CTCAAGCGTATTCAACAAGGG-3'                                                                                                                                                   |
| pCMV-F                  | 5'- TGTCGAGTTTACTCCCTATCAGTGATAGAGAACGTATGTCGAGGTAGGCGTGTACGGTGG -3'                                                                                                          |
| CMV-5'UTR-R             | 5'-GTCGGTCCACGTAGACTAACAACCTGACGGTTCCTAAACGAGCTCTGC-3'                                                                                                                        |
| CMV-5'UTR-F             | 5'-GCAGAGCTCGTTTAGTGAACCGTCAGTTGTTAGTCTACGTGGACCGAC-3'                                                                                                                        |
| 3UTR-F                  | 5'-GAAGCAGGAGTTCTGTGGTAGAAAGC-3'                                                                                                                                              |
| HDVr-R                  | 5'-GGGCGTCGCTTGGTCGGTCATTTCGAACCCAGAGTCCCGCCTCCCTTAGCCATCCGAGTGGACG<br>TCGTCCTCCTTCGGATGCCAGGTCGGACCGCGAGGAGGTGGAGATGCCATGCCGACCCAGAACC<br>TGTTGATTCAACAGCACCATTCCATTTTCTG-3' |
| D2/3817-F               | 5'-AGCACCATAACCAGAGACC-3'                                                                                                                                                     |
| E66G-F                  | 5'-AAAGAGGATTGGACCATCATGGG-3'                                                                                                                                                 |
| E66G-R                  | 5'-CCCATGATGGTCCAATCCTCTTT-3'                                                                                                                                                 |
| D2/5800-R               | 5'-TAGTATAACTGGTTTCATGCAGCG-3'                                                                                                                                                |
| T16                     | 5'-AGCACCGUAAAGACGC-3'                                                                                                                                                        |
| B41                     | 5'-GCGUCUUUACGGUGCUUAAAACAAAACAAAACAAAACAAA-3'                                                                                                                                |
| B16                     | 5'-GCGTCTTTACGGTGCT-3'                                                                                                                                                        |

```

DENV-1 1 SGVLWDT P S P P E V E R A V L D D G I Y R I L Q R G L L G R S Q V G V G V F Q E G V F H T M W H V T R G A V L M Y
DENV-3 1 SGVLWDV P S P P E T Q K A E L E E G V Y R I K Q Q G I F G K T Q V G V G V Q K E G V F H T M W H V T R G A V L T H
DENV-2 1 A G V L W D V P S P P P V G K A E L E D G A Y R I K Q K G I L G Y S Q I G A G V Y K E G T F H T M W H V T R G A V L M H
DENV-4 1 S G A L W D V P S P A A A Q K A T L T E G V Y R I M Q R G L F G K T Q V G V G I H M E G V F H T M W H V T R G S V I C H
JEV 1 G G V F W D T P S P K P C S K G D T T T G V Y R I M A R G I L G T Y Q A G V G V M Y E N V F H T L W H T T R G A A I M S

```

\*

```

DENV-1 61 Q G K R L E P S W A S V K K D L I S Y G G G W R F Q G S W N A G E E V Q V I A V E P G K N P K N V Q T A P G T F K T P E
DENV-3 61 N G K R L E P N W A S V K K D L I S Y G G G W R L S A Q W Q K G E E V Q V I A V E P G K N P K N F Q T M P G I F Q T T T
DENV-2 61 K G K R I E P S W A D V K K D L I S Y G G G W K L E G E W K E G E E V Q V L A I E P G K N P R A V Q T K P G L F K T N T
DENV-4 61 E T G R L E P S W A D V R N D M I S Y G G G W R L G D K W D K E E D V Q V L A I E P G K N P K H V Q T K P G L F K T L T
JEV 61 G E G K L T P Y W G S V K E D R I A Y G G P W R F D R K W N G T D D V Q V I V V E P G K A A V N I Q T K P G V F R T P F

```

```

DENV-1 121 G E V G A I A L D F K P G T S G S P I V N R E G K I V G L Y G N G V V T T S G T Y V S A I A Q A K A S Q E G P L P E I E
DENV-3 121 G E I G A I A L D F K P G T S G S P I I N R E G K V V G L Y G N G V V T K N G G Y V S G I A Q T N A E P D G P T P E L E
DENV-2 121 G T I G A V S L D F S P G T S G S P I I D K K G K V V G L Y G N G V V T R N G A Y V S A I A Q T E K S I E D . N P E I E
DENV-4 121 G E I G A V T L D F K P G T S G S P I I N R K G K V I G L Y G N G V V T K S G D Y V S A I T Q A E R T G E P . D Y E V D
JEV 121 G E V G A V S L D Y P R G T S G S P I L D S N G D I I G L Y G N G V E L G D G S Y V S A I V Q G D R Q E E P V P E A Y T

```

```

DENV-1 181 D E V F .
DENV-3 181 E E M F .
DENV-2 180 D D I F R
DENV-4 180 E D I F R
JEV 181 P N M L .

```

35

36 **Supplementary Figure 1.** Alignment of the amino acid sequences of NS3 protease domain from  
37 DENV-1, 2, 3, and 4, and JEV. The amino acid sequence alignments of the NS3 protease domain  
38 (residues 1-184) of DENV-1 (strain Hawaii), DENV-2 (strain PL046), DENV-3 (strain H-87), DENV-4  
39 (strain H-241), and JEV (strain RP9) are presented. Black boxes indicate identical and conserved amino  
40 acids. \* indicates the BP13944 drug resistance mutation.

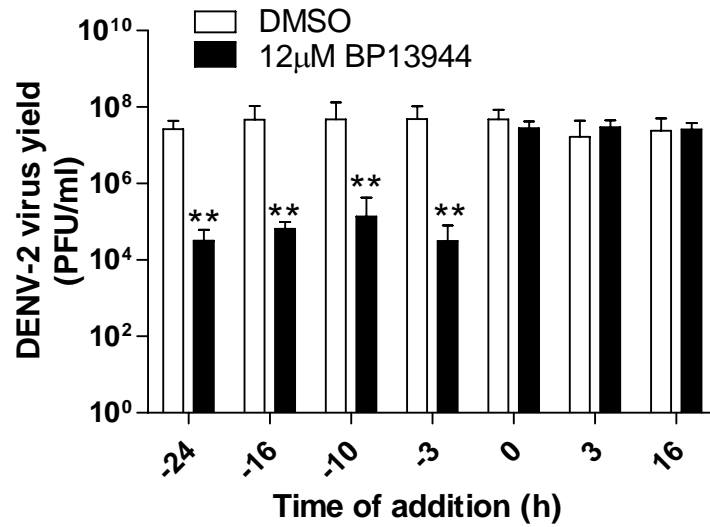

41  
 42 **Supplementary Figure 2. Time-of-addition analysis of BP13944.** BHK-21 cells were synchronously  
 43 infected with DENV-2 at M.O.I of 0.1, and treated with 12 µM of BP13944 or 0.12 % DMSO at the  
 44 indicated times before or after infection. Time point 0 h indicated DENV-2 addition time. The culture  
 45 medium at 72 h post-infection were collected and quantified for viral yields. (\*\* P < 0.0001) (n=3) The  
 46 mean values and S.E.M. from three independent experiments are plotted.

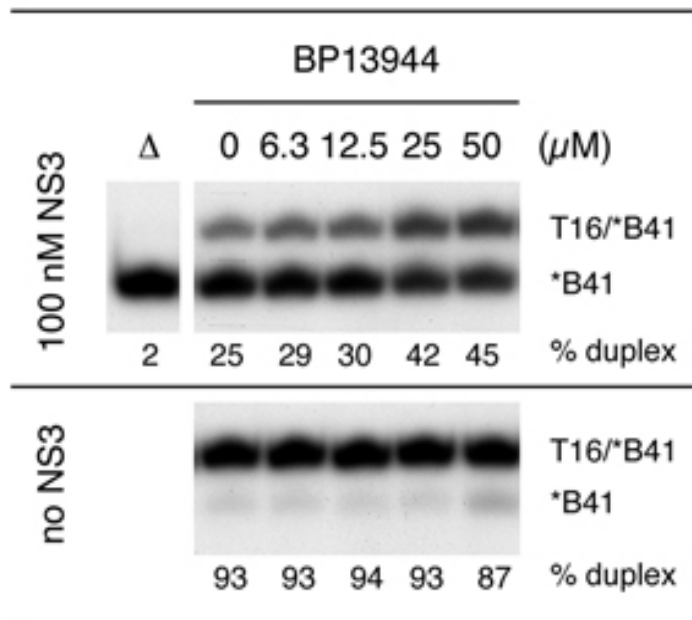

47

48 **Supplementary Figure 3. The effect of BP13944 on DENV NS3 unwinding activity.** Representative  
 49 gels of the unwinding of 3'-tailed RNA duplex T16/B41 by 100 nM NS3 protein (top panel) or no NS3  
 50 protein (bottom panel) in the presence of different concentration of BP13944. Reaction mixtures were  
 51 treated with proteinase K and analyzed on a 20% polyacrylamide-3 M urea gel. Substrate duplex  
 52 T16/B41 and the unwound B41 are shown at the left of the autoradiograph. The remaining RNA duplex  
 53 after a 30 min reaction at 37°C is indicated at the bottom of the autoradiograph. "Δ" represents the  
 54 heat-denatured T16/B41 RNA duplex.

55
